# Supplementary material for: Sodium Danshensu promotes diabetic wound healing by targeting the EGFR-mediated PI3K-AKT pathway: a combined network pharmacology, machine learning, and in vitro approach
Source: RSC Adv. 2026 Mar 10;16(15):13394–407. doi: 10.1039/d5ra09417h (PMC12972934; doi:10.1039/d5ra09417h)
Supplement: RA-016-D5RA09417H-s003 [file RA-016-D5RA09417H-s003.xlsx]

## Sheet: String
Name	AverageShortestPathLength	BetweennessCentrality	ClosenessCentrality	ClusteringCoefficient	Degree	Eccentricity	IsSingleNode	NeighborhoodConnectivity	NumberOfDirectedEdges	NumberOfUndirectedEdges	PartnerOfMultiEdgedNodePairs	Radiality	selected	SelfLoops	shared name	Stress	TopologicalCoefficient
ABCC1	2.35	0.003794176153877979	0.425531914893617	0.4	6	4	FALSE	24.5	0	6	0	0.9754545454545455	FALSE	0	ABCC1	512	0.3333333333333333
EGFR	1.625	0.11843075183319925	0.6153846153846154	0.24175084175084174	55	3	FALSE	17.87272727272727	0	55	0	0.9886363636363636	FALSE	0	EGFR	10106	0.16380316930775646
CASP3	1.6666666666666667	0.07979537992356003	0.6	0.29432624113475175	48	3	FALSE	19.645833333333332	0	48	0	0.9878787878787879	FALSE	0	CASP3	8028	0.1754092261904762
GBA	2.6666666666666665	0.018693089054549084	0.375	0.09523809523809523	7	4	FALSE	8.571428571428571	0	7	0	0.9696969696969697	FALSE	0	GBA	1536	0.20512820512820512
NR1I2	2.625	7.640654489273797E-4	0.38095238095238093	0.4	5	4	FALSE	16.4	0	5	0	0.9704545454545455	FALSE	0	NR1I2	78	0.328
GSTP1	2.175	0.0020904903057978323	0.4597701149425288	0.4888888888888889	10	4	FALSE	26.9	0	10	0	0.9786363636363636	FALSE	0	GSTP1	330	0.29888888888888887
CYP3A4	1.9833333333333334	0.03576617259216229	0.5042016806722689	0.329004329004329	22	3	FALSE	19.363636363636363	0	22	0	0.9821212121212121	FALSE	0	CYP3A4	3084	0.19513314967860423
ACLY	2.4833333333333334	0.003211745503177522	0.40268456375838924	0.39285714285714285	8	4	FALSE	16.25	0	8	0	0.973030303030303	FALSE	0	ACLY	282	0.26639344262295084
GSR	2.2666666666666666	0.014841430240406657	0.4411764705882353	0.3939393939393939	12	4	FALSE	21.416666666666668	0	12	0	0.9769696969696969	FALSE	0	GSR	1536	0.27350427350427353
KDM6B	2.25	0.0168926430427258	0.4444444444444444	0.3888888888888889	9	4	FALSE	25	0	9	0	0.9772727272727273	FALSE	0	KDM6B	1504	0.30120481927710846
PPARG	1.7	0.1088521645193818	0.5882352941176471	0.23995771670190275	44	3	FALSE	18	0	44	0	0.9872727272727272	FALSE	0	PPARG	9210	0.16071428571428573
SCD	2.566666666666667	6.667652322950349E-4	0.3896103896103896	0.6	5	4	FALSE	19.6	0	5	0	0.9715151515151514	FALSE	0	SCD	84	0.3563636363636364
SHBG	2.2333333333333334	0.005002867505485177	0.44776119402985076	0.48484848484848486	12	4	FALSE	20.833333333333332	0	12	0	0.9775757575757575	FALSE	0	SHBG	444	0.2540650406504065
PPARA	1.8833333333333333	0.0384648386385887	0.5309734513274337	0.36243386243386244	28	4	FALSE	22.357142857142858	0	28	0	0.983939393939394	FALSE	0	PPARA	4518	0.2089452603471295
FBP1	2.9	9.095991736438844E-4	0.3448275862068966	0.16666666666666666	4	5	FALSE	8.25	0	4	0	0.9654545454545455	FALSE	0	FBP1	60	0.3229166666666667
SLC2A1	2.033333333333333	0.017727012856272595	0.49180327868852464	0.55	16	4	FALSE	29.875	0	16	0	0.9812121212121212	FALSE	0	SLC2A1	1864	0.2957920792079208
ADA	3.191666666666667	9.136101048678772E-4	0.31331592689295035	0	2	5	FALSE	4.5	0	2	0	0.9601515151515151	FALSE	0	ADA	86	0.5
ADORA2A	2.2416666666666667	0.033292276796354714	0.44609665427509293	0.3333333333333333	7	4	FALSE	27.714285714285715	0	7	0	0.9774242424242424	FALSE	0	ADORA2A	1986	0.32653061224489793
AMPD3	3.4	6.473700591347649E-4	0.29411764705882354	0	2	5	FALSE	4.5	0	2	0	0.9563636363636364	FALSE	0	AMPD3	18	0.5
ADAM10	2.341666666666667	9.061641758600866E-4	0.4270462633451957	0.5714285714285714	8	4	FALSE	29.25	0	8	0	0.9756060606060606	FALSE	0	ADAM10	132	0.3832236842105263
CDK5	2.1666666666666665	0.004524501880943908	0.46153846153846156	0.48717948717948717	13	4	FALSE	24.23076923076923	0	13	0	0.9787878787878789	FALSE	0	CDK5	570	0.27534965034965037
MME	2.4	0.0017088279256286128	0.4166666666666667	0.3333333333333333	7	4	FALSE	21.142857142857142	0	7	0	0.9745454545454546	FALSE	0	MME	188	0.3208791208791209
GRB2	2.025	0.009931934728465175	0.4938271604938272	0.48917748917748916	22	4	FALSE	24.045454545454547	0	22	0	0.9813636363636364	FALSE	0	GRB2	1296	0.25047348484848486
IGF1R	1.95	0.007237946649295724	0.5128205128205129	0.532608695652174	24	3	FALSE	26.291666666666668	0	24	0	0.9827272727272727	FALSE	0	IGF1R	1068	0.2577614379084967
LCK	2.1166666666666667	0.006017252001545211	0.47244094488188976	0.5955882352941176	17	4	FALSE	27.647058823529413	0	17	0	0.9796969696969697	FALSE	0	LCK	860	0.3038138332255979
SRC	1.675	0.10646547485542367	0.5970149253731343	0.25886524822695034	48	3	FALSE	18.020833333333332	0	48	0	0.9877272727272728	FALSE	0	SRC	8640	0.16234984984984985
P2RX4	3.2333333333333334	0	0.30927835051546393	0	1	5	FALSE	7	0	1	0	0.9593939393939394	FALSE	0	P2RX4	0	0
COMT	2.25	0.014122399003088048	0.4444444444444444	0.2967032967032967	14	4	FALSE	15.285714285714286	0	14	0	0.9772727272727273	FALSE	0	COMT	1010	0.19758812615955473
CXCR4	1.875	0.029575706300029064	0.5333333333333333	0.39408866995073893	29	4	FALSE	22.551724137931036	0	29	0	0.9840909090909091	FALSE	0	CXCR4	2952	0.21076377699000967
ESR1	1.6166666666666667	0.14289394943236153	0.6185567010309279	0.24962292609351433	52	3	FALSE	18.48076923076923	0	52	0	0.9887878787878788	FALSE	0	ESR1	11502	0.16337644656228728
ALK	2.1416666666666666	0.0021731953903747305	0.4669260700389105	0.6593406593406593	14	4	FALSE	30.071428571428573	0	14	0	0.9792424242424242	FALSE	0	ALK	332	0.3304552590266876
MAP2K1	2	0.008792821149244635	0.5	0.5190476190476191	21	4	FALSE	27.476190476190474	0	21	0	0.9818181818181818	FALSE	0	MAP2K1	1216	0.27204148986327203
PGR	1.9583333333333333	0.009112064120982272	0.5106382978723405	0.4866666666666667	25	4	FALSE	25.36	0	25	0	0.9825757575757575	FALSE	0	PGR	1294	0.2510891089108911
PTK2	2.058333333333333	0.008990092291474502	0.4858299595141701	0.6198830409356725	19	4	FALSE	27.42105263157895	0	19	0	0.9807575757575758	FALSE	0	PTK2	1146	0.2886426592797784
NTRK3	2.4166666666666665	0.0015259906753432478	0.4137931034482759	0.42857142857142855	7	4	FALSE	22.714285714285715	0	7	0	0.9742424242424242	FALSE	0	NTRK3	224	0.341991341991342
JUN	1.6833333333333333	0.07331491535212441	0.594059405940594	0.28191489361702127	48	3	FALSE	18.958333333333332	0	48	0	0.9875757575757577	FALSE	0	JUN	7134	0.17234848484848486
PIK3R1	1.9833333333333334	0.006813885297717267	0.5042016806722689	0.5398550724637681	24	4	FALSE	25.125	0	24	0	0.9821212121212121	FALSE	0	PIK3R1	920	0.2537878787878788
ALOX12	2.7666666666666666	0.0013227252272846812	0.3614457831325301	0.4	5	5	FALSE	13	0	5	0	0.9678787878787879	FALSE	0	ALOX12	84	0.35135135135135137
LTB4R	2.575	0.006469840483709607	0.3883495145631068	0.3055555555555556	9	4	FALSE	11.333333333333334	0	9	0	0.9713636363636363	FALSE	0	LTB4R	780	0.22004357298474944
FYN	2.091666666666667	0.02464873182180165	0.4780876494023904	0.49019607843137253	18	4	FALSE	24.11111111111111	0	18	0	0.9801515151515151	FALSE	0	FYN	2194	0.2586618876941458
ALOX15	2.475	0.003123339599408701	0.40404040404040403	0.4666666666666667	6	4	FALSE	16.666666666666668	0	6	0	0.9731818181818181	FALSE	0	ALOX15	340	0.2604166666666667
ALOX5	2.316666666666667	0.019434156481418167	0.4316546762589928	0.28205128205128205	13	4	FALSE	15.846153846153847	0	13	0	0.976060606060606	FALSE	0	ALOX5	2298	0.2130977130977131
FPR2	2.5	0.001300402246068689	0.4	0.6190476190476191	7	4	FALSE	16.714285714285715	0	7	0	0.9727272727272728	FALSE	0	FPR2	174	0.2785714285714286
NFKB1	1.8083333333333333	0.02372339420180287	0.5529953917050692	0.4134453781512605	35	4	FALSE	23.057142857142857	0	35	0	0.9853030303030303	FALSE	0	NFKB1	3446	0.21153342070773262
PTGER1	3.2583333333333333	3.5157652804711627E-4	0.3069053708439898	0.3333333333333333	3	5	FALSE	8	0	3	0	0.958939393939394	FALSE	0	PTGER1	20	0.5111111111111111
CXCL8	1.9	0.059431951810818805	0.5263157894736842	0.31527093596059114	29	4	FALSE	20.689655172413794	0	29	0	0.9836363636363636	FALSE	0	CXCL8	5664	0.2021636240703178
AOC3	2.55	0.002248469069984843	0.3921568627450981	0.26666666666666666	6	4	FALSE	15.166666666666666	0	6	0	0.9718181818181819	FALSE	0	AOC3	204	0.2830188679245283
C5AR1	2.525	0.0010825068652454365	0.39603960396039606	0.6	6	4	FALSE	18.333333333333332	0	6	0	0.9722727272727273	FALSE	0	C5AR1	90	0.3132183908045977
FPR1	2.3666666666666667	9.819202932985559E-4	0.4225352112676056	0.7333333333333333	6	4	FALSE	26.333333333333332	0	6	0	0.9751515151515151	FALSE	0	FPR1	170	0.341991341991342
GUSB	2.441666666666667	0.03405879540482408	0.40955631399317405	0.23809523809523808	7	4	FALSE	14.714285714285714	0	7	0	0.9737878787878788	FALSE	0	GUSB	2328	0.23271889400921658
ITGAL	2.5	7.55412777475303E-4	0.4	0.6190476190476191	7	4	FALSE	22	0	7	0	0.9727272727272728	FALSE	0	ITGAL	88	0.36666666666666664
MAOA	2.216666666666667	0.010088474124311318	0.45112781954887216	0.41818181818181815	11	3	FALSE	18.181818181818183	0	11	0	0.9778787878787878	FALSE	0	MAOA	1102	0.21905805038335158
APEX1	2.3583333333333334	0.0012592317440375243	0.42402826855123676	0.5714285714285714	7	4	FALSE	23.142857142857142	0	7	0	0.9753030303030303	FALSE	0	APEX1	162	0.31702544031311153
BLM	2.558333333333333	6.172266850238955E-4	0.39087947882736157	0.7142857142857143	7	4	FALSE	18.428571428571427	0	7	0	0.9716666666666667	FALSE	0	BLM	106	0.32908163265306123
TOP2A	2.175	0.005925004757351745	0.4597701149425288	0.5166666666666667	16	4	FALSE	22.0625	0	16	0	0.9786363636363636	FALSE	0	TOP2A	898	0.2595588235294118
NFE2L2	2.0166666666666666	0.011154541187536903	0.49586776859504134	0.5029239766081871	19	4	FALSE	26.789473684210527	0	19	0	0.9815151515151516	FALSE	0	NFE2L2	1544	0.26789473684210524
TOP1	2.3916666666666666	7.66291179914166E-4	0.4181184668989547	0.7142857142857143	8	4	FALSE	27	0	8	0	0.9746969696969697	FALSE	0	TOP1	114	0.38571428571428573
AR	1.95	0.018174396291742854	0.5128205128205129	0.49	25	4	FALSE	25.72	0	25	0	0.9827272727272727	FALSE	0	AR	2068	0.252156862745098
HSD17B1	2.2333333333333334	0.0012791117705575317	0.44776119402985076	0.7111111111111111	10	4	FALSE	25.2	0	10	0	0.9775757575757575	FALSE	0	HSD17B1	240	0.3
NR3C1	1.9166666666666667	0.017676986620422715	0.5217391304347826	0.43478260869565216	23	3	FALSE	25.73913043478261	0	23	0	0.9833333333333334	FALSE	0	NR3C1	2298	0.24055262088581877
CCNE1	2.1166666666666667	0.01254808824928936	0.47244094488188976	0.6190476190476191	15	4	FALSE	28.266666666666666	0	15	0	0.9796969696969697	FALSE	0	CCNE1	1290	0.3065217391304348
CDK2	2.0416666666666665	0.015036568044358775	0.489795918367347	0.4199134199134199	22	4	FALSE	22.59090909090909	0	22	0	0.9810606060606061	FALSE	0	CDK2	1932	0.24032882011605416
TRIM24	2.216666666666667	4.550086711082037E-4	0.45112781954887216	0.6944444444444444	9	4	FALSE	29.88888888888889	0	9	0	0.9778787878787878	FALSE	0	TRIM24	68	0.34355044699872284
ESR2	1.95	0.015682898364217164	0.5128205128205129	0.5072463768115942	24	4	FALSE	26.125	0	24	0	0.9827272727272727	FALSE	0	ESR2	1986	0.2536407766990291
KDM4A	2.7583333333333333	0.0023493939883195837	0.36253776435045315	0.3333333333333333	4	5	FALSE	14.5	0	4	0	0.968030303030303	FALSE	0	KDM4A	216	0.3625
CDK1	2.025	0.03370893105625941	0.4938271604938272	0.43333333333333335	21	4	FALSE	23.428571428571427	0	21	0	0.9813636363636364	FALSE	0	CDK1	3210	0.2435515873015873
CYP19A1	2.025	0.00818208959699145	0.4938271604938272	0.5661764705882353	17	4	FALSE	27.235294117647058	0	17	0	0.9813636363636364	FALSE	0	CYP19A1	1026	0.26965637740244613
KDM4C	2.6	2.334267040149393E-5	0.3846153846153846	0.6666666666666666	3	4	FALSE	26	0	3	0	0.9709090909090908	FALSE	0	KDM4C	2	0.5
AVPR1B	2.85	1.1204481792717087E-4	0.3508771929824561	0	2	5	FALSE	18	0	2	0	0.9663636363636363	FALSE	0	AVPR1B	8	0.5666666666666667
GPBAR1	2.2583333333333333	0.020742542739235238	0.44280442804428044	0.3333333333333333	7	4	FALSE	26.142857142857142	0	7	0	0.9771212121212122	FALSE	0	GPBAR1	1354	0.3078231292517007
KIF11	2.825	0.001336372502842961	0.35398230088495575	0.6190476190476191	7	5	FALSE	12.714285714285714	0	7	0	0.9668181818181818	FALSE	0	KIF11	64	0.39285714285714285
CA2	2.575	7.32645999576301E-5	0.3883495145631068	0.6666666666666666	3	4	FALSE	23.666666666666668	0	3	0	0.9713636363636363	FALSE	0	CA2	8	0.4226190476190476
CFTR	2.3916666666666666	0.0025020707166250817	0.4181184668989547	0.26666666666666666	6	4	FALSE	24.666666666666668	0	6	0	0.9746969696969697	FALSE	0	CFTR	214	0.33796296296296297
CACNA2D1	3.0083333333333333	0.00840585769430372	0.33240997229916897	0	2	5	FALSE	8.5	0	2	0	0.9634848484848485	FALSE	0	CACNA2D1	616	0.5
PDGFRA	2.05	0.026166662736535874	0.48780487804878053	0.5904761904761905	15	4	FALSE	28.933333333333334	0	15	0	0.980909090909091	FALSE	0	PDGFRA	1946	0.2915824915824916
SCN3A	3.7416666666666667	3.828197945845005E-4	0.26726057906458794	0	2	5	FALSE	3	0	2	0	0.9501515151515152	FALSE	0	SCN3A	12	0.5
CAPN1	2.55	3.4306120108862245E-4	0.3921568627450981	0.5	4	4	FALSE	19.75	0	4	0	0.9718181818181819	FALSE	0	CAPN1	32	0.3611111111111111
CTSD	2.216666666666667	0.012287180574562226	0.45112781954887216	0.36363636363636365	12	4	FALSE	22.333333333333332	0	12	0	0.9778787878787878	FALSE	0	CTSD	1160	0.26587301587301587
NGFR	2.191666666666667	0.002352757537503684	0.4562737642585551	0.5909090909090909	12	4	FALSE	29.25	0	12	0	0.9783333333333333	FALSE	0	NGFR	328	0.34011627906976744
LGALS3	2.091666666666667	0.018026661644419	0.4780876494023904	0.5897435897435898	13	4	FALSE	29.615384615384617	0	13	0	0.9801515151515151	FALSE	0	LGALS3	1292	0.3076923076923077
SLC1A2	2.5	0.0034365255526116823	0.4	0.3	5	4	FALSE	19.4	0	5	0	0.9727272727272728	FALSE	0	SLC1A2	464	0.3180327868852459
PDCD4	2.325	0	0.4301075268817204	1	5	4	FALSE	41.6	0	5	0	0.9759090909090908	FALSE	0	PDCD4	0	0.52
PPARD	2.275	0.0016372787390755183	0.43956043956043955	0.6944444444444444	9	4	FALSE	31.11111111111111	0	9	0	0.9768181818181818	FALSE	0	PPARD	232	0.3794037940379404
MDM4	2.35	0.0010522466698404227	0.425531914893617	0.5357142857142857	8	4	FALSE	27.625	0	8	0	0.9754545454545455	FALSE	0	MDM4	144	0.3767123287671233
MMP1	2.175	6.702285657345943E-5	0.4597701149425288	0.9722222222222222	9	4	FALSE	39.666666666666664	0	9	0	0.9786363636363636	FALSE	0	MMP1	16	0.4311594202898551
NOX1	2.25	1.7157438269444023E-4	0.4444444444444444	0.9523809523809523	7	4	FALSE	36.285714285714285	0	7	0	0.9772727272727273	FALSE	0	NOX1	48	0.4219269102990033
CDC25C	2.341666666666667	0.003044110012877994	0.4270462633451957	0.5303030303030303	12	4	FALSE	19.916666666666668	0	12	0	0.9756060606060606	FALSE	0	CDC25C	452	0.27662037037037035
ERN1	2.3666666666666667	0	0.4225352112676056	1	6	4	FALSE	37	0	6	0	0.9751515151515151	FALSE	0	ERN1	0	0.5
MELK	2.341666666666667	0.001113035712145669	0.4270462633451957	0.8214285714285714	8	4	FALSE	24.125	0	8	0	0.9756060606060606	FALSE	0	MELK	228	0.3260135135135135
PIN1	2.591666666666667	4.3757734353709584E-5	0.3858520900321543	0.6666666666666666	4	4	FALSE	25.75	0	4	0	0.9710606060606061	FALSE	0	PIN1	12	0.4681818181818182
YWHAG	2.341666666666667	0.0015587200844214757	0.4270462633451957	0.3055555555555556	9	4	FALSE	21.11111111111111	0	9	0	0.9756060606060606	FALSE	0	YWHAG	232	0.2942097026604069
SAE1	3.0166666666666666	0	0.3314917127071823	0	1	5	FALSE	21	0	1	0	0.9633333333333334	FALSE	0	SAE1	0	0
TYR	2.275	0.0019062527193812373	0.43956043956043955	0.3333333333333333	6	4	FALSE	23.833333333333332	0	6	0	0.9768181818181818	FALSE	0	TYR	220	0.285140562248996
SLC6A4	2.3583333333333334	0.015378266367890005	0.42402826855123676	0.37777777777777777	10	4	FALSE	14.9	0	10	0	0.9753030303030303	FALSE	0	SLC6A4	1264	0.2144927536231884
HTR1A	2.283333333333333	0.006238982590716714	0.43795620437956206	0.6071428571428571	8	4	FALSE	21.875	0	8	0	0.9766666666666667	FALSE	0	HTR1A	748	0.273438
TTR	2.3583333333333334	0.0021384179515330243	0.42402826855123676	0.32142857142857145	8	4	FALSE	16.625	0	8	0	0.9753030303030303	FALSE	0	TTR	188	0.22773972602739725
MIF	2.316666666666667	0.0011018334259932003	0.4316546762589928	0.6	6	4	FALSE	29.333333333333332	0	6	0	0.976060606060606	FALSE	0	MIF	150	0.36666666666666664
NR4A1	2.2666666666666666	1.5596798159823368E-4	0.4411764705882353	0.8571428571428571	7	4	FALSE	33.714285714285715	0	7	0	0.9769696969696969	FALSE	0	NR4A1	30	0.39663865546218485
PTGFR	2.875	0.00103729925822252	0.34782608695652173	0	2	5	FALSE	16	0	2	0	0.9659090909090909	FALSE	0	PTGFR	198	0.5357142857142857
S1PR5	2.6	0	0.3846153846153846	1	3	4	FALSE	27.666666666666668	0	3	0	0.9709090909090908	FALSE	0	S1PR5	0	0.5220125786163522
S1PR3	2.3333333333333335	0.0022402837947521595	0.42857142857142855	0.5333333333333333	6	4	FALSE	27.5	0	6	0	0.9757575757575757	FALSE	0	S1PR3	292	0.36444444444444446
HSD11B1	2.5166666666666666	0.002021872276353057	0.3973509933774835	0.4666666666666667	6	4	FALSE	20	0	6	0	0.9724242424242424	FALSE	0	HSD11B1	232	0.34195402298850575
OTC	2.908333333333333	0.0019894175310802534	0.34383954154727797	0	3	4	FALSE	9.666666666666666	0	3	0	0.9653030303030303	FALSE	0	OTC	140	0.3466666666666667
ECE1	3.0833333333333335	0	0.3243243243243243	0	1	5	FALSE	13	0	1	0	0.962121212121212	FALSE	0	ECE1	0	0
THRA	2.2916666666666665	9.362709517758624E-4	0.4363636363636364	0.5714285714285714	8	4	FALSE	24.25	0	8	0	0.9765151515151516	FALSE	0	THRA	122	0.3069620253164557
KLF5	2.2083333333333335	4.4697237150112654E-4	0.45283018867924524	0.8055555555555556	9	4	FALSE	33.55555555555556	0	9	0	0.978030303030303	FALSE	0	KLF5	86	0.3813131313131313
NEU3	2.6166666666666667	0	0.38216560509554137	0	1	4	FALSE	55	0	1	0	0.9706060606060606	FALSE	0	NEU3	0	0
PTPRA	2.3916666666666666	7.791866311136087E-5	0.4181184668989547	0.8571428571428571	7	4	FALSE	29.571428571428573	0	7	0	0.9746969696969697	FALSE	0	PTPRA	14	0.4050880626223092
PTPN2	2.441666666666667	0	0.40955631399317405	1	4	4	FALSE	34.5	0	4	0	0.9737878787878788	FALSE	0	PTPN2	0	0.4859154929577465
KLK1	2.6083333333333334	0	0.38338658146964855	0	1	4	FALSE	52	0	1	0	0.9707575757575757	FALSE	0	KLK1	0	0
THRB	2.375	0.0010731454047548587	0.42105263157894735	0.4	6	4	FALSE	24.333333333333332	0	6	0	0.975	FALSE	0	THRB	118	0.3403755868544601
RXFP1	2.433333333333333	0	0.4109589041095891	1	3	4	FALSE	41.666666666666664	0	3	0	0.973939393939394	FALSE	0	RXFP1	0	0.6127450980392157
FTO	2.5833333333333335	0.0010318837121702615	0.3870967741935484	0.3333333333333333	3	4	FALSE	21	0	3	0	0.9712121212121212	FALSE	0	FTO	134	0.389937106918239
FUCA1	3.433333333333333	0	0.29126213592233013	0	1	5	FALSE	7	0	1	0	0.9557575757575758	FALSE	0	FUCA1	0	0
TACR2	3.0833333333333335	0	0.3243243243243243	0	1	5	FALSE	18	0	1	0	0.962121212121212	FALSE	0	TACR2	0	0
SI	2.5	0.00556704872415739	0.4	0.3	5	4	FALSE	18.4	0	5	0	0.9727272727272728	FALSE	0	SI	462	0.31186440677966104
GBA2	3.658333333333333	0	0.2733485193621868	0	1	5	FALSE	7	0	1	0	0.9516666666666667	FALSE	0	GBA2	0	0
GPR35	3.25	0	0.3076923076923077	0	1	5	FALSE	7	0	1	0	0.9590909090909091	FALSE	0	GPR35	0	0
GRIK2	3	0.008489752401586486	0.3333333333333333	0.16666666666666666	4	4	FALSE	7.25	0	4	0	0.9636363636363636	FALSE	0	GRIK2	630	0.32142857142857145
HTR2B	3.1083333333333334	0	0.32171581769436997	1	3	4	FALSE	9.666666666666666	0	3	0	0.9616666666666667	FALSE	0	HTR2B	0	0.6444444444444445
KDM5C	3.1416666666666666	4.988316875571777E-4	0.3183023872679045	0.3333333333333333	3	5	FALSE	5.333333333333333	0	3	0	0.9610606060606061	FALSE	0	KDM5C	24	0.38461538461538464
